# Supplementary material
Source: MDPI journal article supplement (https://www.mdpi.com/2075-163X/9/10/613)
Supplement: s1 [file s1]

schematic overlay of the Atlas 5  
large-area SEM (BSE) image mosaic  
on the light-microscopy mosaic

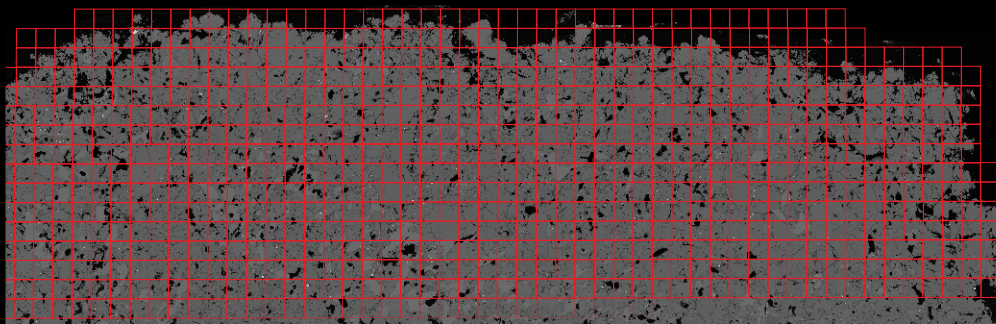

Fig. 6b

Fig. 6d

Fig. 6c

Fig. 6a

Fig. 5b

Atlas 5 SEM image mosaic = 2824 image tiles

Fig. 5c

Fig. 5a

Fig. 6f

Spinel

Light-microscopy image mosaic = 334 image tiles

5 mm
