# Supplementary material
Source: MDPI journal article supplement (https://www.mdpi.com/2075-163X/9/10/613)
Supplement: s1 [file s1]

Archive with 7 entries (7 files):
- Supplementary Files/SFig-1.pdf
- Supplementary Files/SFig-2.pdf
- Supplementary Files/SFig-3.pdf
- Supplementary Files/SFig-4.pdf
- Supplementary Files/SFig-5.pdf
- Supplementary Files/Table-S1-D-648 Parker Phlogopite1 v9e.xls
- Supplementary Files/Table-S2-D-649 Parker Phlogopite2 v9e.xls
