# Supplementary material
Source: MDPI journal article supplement (https://www.mdpi.com/2075-163X/9/10/613)
Supplement: s1 [file s1 › Supplementary Files/Table-S1-D-648 Parker Phlogopite1 v9e.xls]

## Sheet: DT_Values
Sample no	Mineral		J	± (1s)	% error		Int Age (Ma)	± (2 s)	with ± in J		Plateau Age	± (2s)	with ± in J	MSWD	% 39Ar
Parker	Phlogopite		0.015287	3.3e-05	0.21587		1141.52	5.45227	6.56234		1140.76	5.74871	6.80969	0.193365	94.2532	Probability	Initial Ratio	Initial Ratio Error
Can/Pos	213/BM2	D-648r								IsoPlot PA-->	1141.9	3.3	na	0.19	94.3	0.999	na	na
						Decay corrected true ratios				IsoPlot CA-->	na	na	na	na	na	na	na	na
Step no	Power	40Ar/39Ar	±	38Ar/39Ar	±	37Ar/39Ar	±	36Ar/39Ar	±	40Ar*/39Ar(K)	±	40Ar*	Cumulative	Age	±	Ca/K	±	Cl/K	±
	(%)		(1 s)		(1 s)		(1 s)		(1 s)		(1 s)	(%)	39Ar (%)	(Ma)	(1 s)		(1 s)		(1 s)
1	0.5	63.9813	0.979903	0.383237	0.0152876	0.283661	0.150669	0.0572072	0.00407088	47.1134	1.38196	73.6214	0.115318	978.628	22.1559	0.519204	0.276832	0.0824761	0.0079758
2	1	61.3622	0.456025	0.0839133	0.0038851	0.0581971	0.0331542	0.00635688	0.0006517	59.4674	0.4821	96.908	0.668636	1166.55	6.96451	0.106505	0.060876	0.0158074	0.0016379
3	1.5	59.666	0.379954	0.0719431	0.00189616	0.0414976	0.0178311	0.00296201	0.000491721	58.7712	0.401506	98.4973	5.7468	1156.47	5.83276	0.0759429	0.0328219	0.0132004	0.00122666
4	1.75	58.0991	0.266619	0.0681138	0.00200413	0.0168605	0.020361	0.000760901	0.000304442	57.8513	0.280345	99.5723	11.4703	1143.05	4.10301	0.0308551	0.0372886	0.0124143	0.00117318
5	2	58.0433	0.682035	0.0720855	0.00457931	1.64881e-06	0.0656274	0.00295161	0.00118246	57.1463	0.75703	98.4547	20.2134	1132.71	11.1433	3.01732e-06	0.120098	0.0132329	0.0015569
6	2.25	58.5228	0.312097	0.0699162	0.00214816	0.028664	0.0169218	0.00189902	0.000308035	57.9403	0.322153	99.0026	26.0226	1144.36	4.71151	0.0524562	0.0310631	0.0127799	0.00121529
7	2.5	57.9713	0.320305	0.0685731	0.00178528	0.0344058	0.0169153	0.000899832	0.000342039	57.6846	0.334409	99.5031	30.6661	1140.61	4.90091	0.0629642	0.0310936	0.0125142	0.00116214
8	2.75	57.8618	0.366663	0.0697637	0.00210796	0.0261383	0.0165631	0.000756452	0.000321526	57.6166	0.377303	99.5744	35.6612	1139.62	5.53259	0.0478339	0.0303924	0.0127942	0.00121232
9	3	58.2106	0.617799	0.072196	0.00446652	1.23685e-06	0.0717907	0.000745804	0.00124886	57.9655	0.717449	99.579	47.3164	1144.73	10.4906	2.26343e-06	0.131377	0.0133537	0.00154824
10	3.25	57.88	0.448492	0.0700372	0.0035157	0.0468425	0.0371635	0.00146449	0.000910669	57.4281	0.520104	99.216	65.2205	1136.85	7.63826	0.0857245	0.068128	0.0128268	0.00137644
11	3.5	58.3052	0.634065	0.0702041	0.00279842	0.0803303	0.0545039	0.00188186	0.00112012	57.7341	0.709877	99.0149	76.3989	1141.34	10.3994	0.147013	0.0999813	0.0128477	0.00128642
12	3.68	58.1898	0.646126	0.0685569	0.00408962	0.0279584	0.0747294	0.00087685	0.00154896	57.9091	0.789373	99.5157	86.0013	1143.9	11.5475	0.0511648	0.136778	0.0125114	0.00143636
13	3.85	57.9998	0.313149	0.0700434	0.00210767	0.0146136	0.0172037	0.000508818	0.000298457	57.8263	0.324455	99.7	93.7557	1142.69	4.74955	0.0267431	0.0315077	0.012869	0.00121863
14	4.01	58.1913	0.320765	0.0705194	0.00213399	0.0274361	0.0197781	0.00073766	0.000394462	57.9518	0.340075	99.5866	97.5468	1144.53	4.97314	0.0502091	0.0362696	0.0129688	0.00122901
15	4.16	57.9659	0.349974	0.0694956	0.00282349	0.0280436	0.0248459	0.000729524	0.000408751	57.7289	0.368913	99.5891	99.3622	1141.26	5.40463	0.0513208	0.0455314	0.0127337	0.00128265
16	4.25	58.1289	0.390068	0.0687267	0.00257139	2.37842e-05	0.031919	0.00127391	0.000668677	57.7274	0.434907	99.3094	99.9683	1141.24	6.37153	4.35251e-05	0.0584118	0.0125328	0.00123883
17	7	62.2245	1.71215	0.0812905	0.0146101	0.000454886	0.484824	0.0222113	0.0107717	55.6369	3.52933	89.4132	100	1110.35	52.5988	0.000832441	0.887229	0.0145179	0.00360659

## Sheet: PlotDat1
Source sheet	Data table	0	934.316	0	1141.95	0.115318	978.628
Plot name	ArStepHeat1	0.115318	934.316	100	1141.95	0.115318	1166.55
Plot Type	18	0.115318	1022.94			ShapeLine	ShapeLine
1st free col	9	0	1022.94
Sigma Level	1	0	934.316
Absolute Errs	TRUE	ErrBox	ErrBox
Symbol Type	1	0.115318	1152.62
Inverse Plot	TRUE	0.668636	1152.62
Color Plot	TRUE	0.668636	1180.48
3D plot	FALSE	0.115318	1180.48
Linear	FALSE	0.115318	1152.62
Data Range	N5:P23	ErrBox	ErrBox
Filled Symbols	TRUE	0.668636	1144.8
ConcAge	FALSE	5.7468	1144.8
ConcSwap	FALSE	5.7468	1168.13
1st Symbol-row	1	0.668636	1168.13
		0.668636	1144.8
		ErrBox	ErrBox
		5.7468	1134.85
		11.4703	1134.85
		11.4703	1151.26
		5.7468	1151.26
		5.7468	1134.85
		ErrBox	ErrBox
		11.4703	1110.42
		20.2134	1110.42
		20.2134	1154.99
		11.4703	1154.99
		11.4703	1110.42
		ErrBox	ErrBox
		20.2134	1134.93
		26.0226	1134.93
		26.0226	1153.78
		20.2134	1153.78
		20.2134	1134.93
		ErrBox	ErrBox
		26.0226	1130.81
		30.6661	1130.81
		30.6661	1150.41
		26.0226	1150.41
		26.0226	1130.81
		ErrBox	ErrBox
		30.6661	1128.55
		35.6612	1128.55
		35.6612	1150.68
		30.6661	1150.68
		30.6661	1128.55
		ErrBox	ErrBox
		35.6612	1123.74
		47.3164	1123.74
		47.3164	1165.71
		35.6612	1165.71
		35.6612	1123.74
		ErrBox	ErrBox
		47.3164	1121.57
		65.2205	1121.57
		65.2205	1152.13
		47.3164	1152.13
		47.3164	1121.57
		ErrBox	ErrBox
		65.2205	1120.54
		76.3989	1120.54
		76.3989	1162.14
		65.2205	1162.14
		65.2205	1120.54
		ErrBox	ErrBox
		76.3989	1120.8
		86.0013	1120.8
		86.0013	1166.99
		76.3989	1166.99
		76.3989	1120.8
		ErrBox	ErrBox
		86.0013	1133.19
		93.7557	1133.19
		93.7557	1152.19
		86.0013	1152.19
		86.0013	1133.19
		ErrBox	ErrBox
		93.7557	1134.58
		97.5468	1134.58
		97.5468	1154.47
		93.7557	1154.47
		93.7557	1134.58
		ErrBox	ErrBox
		97.5468	1130.45
		99.3622	1130.45
		99.3622	1152.07
		97.5468	1152.07
		97.5468	1130.45
		ErrBox	ErrBox
		99.3622	1128.5
		99.9683	1128.5
		99.9683	1153.98
		99.3622	1153.98
		99.3622	1128.5
		ErrBox	ErrBox
		99.9683	1005.15
		100	1005.15
		100	1215.55
		99.9683	1215.55
		99.9683	1005.15
		ErrBox	ErrBox

## Sheet: PlotDat3
Source sheet	Corr Plot	0.0156338	0.000891501	0.0145	0.00121327	0.01622	0.00089208	0.0166006	0.000103049	0.0170293	4.91719e-05	0.0174142	1.27262e-05	0.0177333	5.05756e-05	0.017319	3.20282e-05	0.0174919	1.50666e-05	0.0175595	1.26473e-05	0.0176345	1.25007e-05	0.0176134	2.47872e-05	0.0176158	3.16121e-05	0.0176611	1.46488e-05	0.0174782	8.39772e-06	0.0174253	1.22409e-05	0.0175152	1.21514e-05	0.0174948	2.16306e-05	0.0171617	0.000357325
Plot name	Isochron3	0.016304	0.000103021	0.0171954	0	0.0162135	0.000914771	0.0165973	0.000106915	0.0170264	5.21779e-05	0.017412	1.4639e-05	0.0177278	5.80091e-05	0.0173165	3.39486e-05	0.0174893	1.72201e-05	0.0175565	1.46755e-05	0.0176295	2.03324e-05	0.0176098	3.053e-05	0.0176107	3.86237e-05	0.0176559	2.43655e-05	0.0174757	1.02761e-05	0.0174227	1.47152e-05	0.0175124	1.47254e-05	0.0174917	2.58294e-05	0.0171495	0.00042041
Plot Type	2	0.016768	4.9164e-05			0.0161939	0.000936942	0.0165874	0.000110695	0.0170177	5.51165e-05	0.0174056	1.6509e-05	0.0177113	6.52762e-05	0.0173091	3.58259e-05	0.0174816	1.93254e-05	0.0175476	1.66584e-05	0.0176146	2.79892e-05	0.0175989	3.61444e-05	0.0175955	4.54784e-05	0.0176403	3.3865e-05	0.0174681	1.21125e-05	0.017415	1.71343e-05	0.0175039	1.7242e-05	0.0174823	2.99343e-05	0.0171135	0.000482075
1st free col	41	0.0172207	1.27228e-05			0.0161619	0.000958099	0.0165713	0.000114303	0.0170034	5.79222e-05	0.017395	1.82945e-05	0.0176842	7.22145e-05	0.0172969	3.76183e-05	0.0174688	2.13355e-05	0.0175329	1.85516e-05	0.0175902	3.52998e-05	0.017581	4.15048e-05	0.0175706	5.20231e-05	0.0176148	4.29351e-05	0.0174557	1.38659e-05	0.0174023	1.9444e-05	0.01749	1.96447e-05	0.0174668	3.38535e-05	0.0170543	0.00054094
Sigma Level	1	0.0172375	5.05587e-05			0.0161181	0.000977767	0.0165491	0.000117659	0.0169839	6.05322e-05	0.0173806	1.99555e-05	0.0176471	7.86691e-05	0.0172802	3.92857e-05	0.0174514	2.32054e-05	0.0175129	2.03128e-05	0.0175569	4.21011e-05	0.0175565	4.64916e-05	0.0175365	5.81115e-05	0.0175799	5.13732e-05	0.0174386	1.54971e-05	0.017385	2.15927e-05	0.0174709	2.188e-05	0.0174457	3.74995e-05	0.0169734	0.000595693
Absolute Errs	TRUE	0.0170958	3.20231e-05			0.0160634	0.000995508	0.0165214	0.000120689	0.0169596	6.28883e-05	0.0173625	2.14549e-05	0.0176009	8.44957e-05	0.0172594	4.07909e-05	0.0174296	2.48935e-05	0.0174879	2.19027e-05	0.0175153	4.82411e-05	0.0175259	5.09933e-05	0.0174939	6.36076e-05	0.0175363	5.89906e-05	0.0174174	1.69697e-05	0.0173634	2.35325e-05	0.0174472	2.38979e-05	0.0174193	4.07909e-05	0.0168724	0.000645109
Symbol Type	1	0.0172585	1.50617e-05			0.0159992	0.00101093	0.016489	0.000123323	0.0169309	6.49378e-05	0.0173413	2.27593e-05	0.0175466	8.95643e-05	0.017235	4.21003e-05	0.017404	2.63618e-05	0.0174585	2.32858e-05	0.0174663	5.35826e-05	0.01749	5.49095e-05	0.0174439	6.83888e-05	0.0174851	6.56174e-05	0.0173924	1.82507e-05	0.0173379	2.522e-05	0.0174192	2.56533e-05	0.0173884	4.36541e-05	0.0167537	0.000688084
Inverse Plot	TRUE	0.0172913	1.2644e-05			0.0159268	0.00102368	0.0164523	0.000125504	0.0168986	6.66349e-05	0.0173174	2.38394e-05	0.0174854	9.37615e-05	0.0172074	4.31845e-05	0.0173752	2.75778e-05	0.0174254	2.44311e-05	0.0174112	5.80063e-05	0.0174495	5.81526e-05	0.0173874	7.23481e-05	0.0174274	7.11055e-05	0.0173642	1.93115e-05	0.0173093	2.66175e-05	0.0173877	2.71071e-05	0.0173535	4.60252e-05	0.01662	0.000723659
Color Plot	TRUE	0.0171879	1.2497e-05			0.0158478	0.00103347	0.0164124	0.000127183	0.0168634	6.79418e-05	0.0172914	2.46713e-05	0.0174186	9.69937e-05	0.0171774	4.40194e-05	0.0173438	2.85142e-05	0.0173893	2.53132e-05	0.0173511	6.14134e-05	0.0174054	6.06502e-05	0.0173259	7.53971e-05	0.0173645	7.53322e-05	0.0173335	2.01286e-05	0.0172781	2.76938e-05	0.0173534	2.82267e-05	0.0173154	4.78512e-05	0.0164741	0.00075104
3D plot	FALSE	0.0172856	2.47786e-05			0.0157641	0.0010401	0.01637	0.000128322	0.0168261	6.88292e-05	0.0172638	2.52362e-05	0.0173478	9.91885e-05	0.0171455	4.45863e-05	0.0173104	2.915e-05	0.0173509	2.59122e-05	0.0172873	6.37278e-05	0.0173585	6.23464e-05	0.0172607	7.74678e-05	0.0172977	7.82032e-05	0.017301	2.06835e-05	0.0172449	2.84249e-05	0.0173169	2.89872e-05	0.017275	4.90914e-05	0.0163194	0.000769613
Linear	FALSE	0.017159	3.1599e-05			0.0156775	0.00104341	0.0163262	0.000128896	0.0167875	6.92773e-05	0.0172352	2.55216e-05	0.0172745	0.000100297	0.0171125	4.48726e-05	0.0172759	2.94712e-05	0.0173113	2.62149e-05	0.0172213	6.48978e-05	0.0173101	6.32035e-05	0.0171932	7.85139e-05	0.0172287	7.96543e-05	0.0172673	2.09639e-05	0.0172106	2.87944e-05	0.0172792	2.93715e-05	0.0172332	4.97179e-05	0.0161594	0.000778965
Data Range	D5:H23	0.0171937	1.46408e-05			0.0155899	0.00104332	0.0162819	0.000128892	0.0167484	6.92761e-05	0.0172063	2.55211e-05	0.0172004	0.000100295	0.0170792	4.48718e-05	0.0172411	2.94705e-05	0.0172712	2.62144e-05	0.0171546	6.48973e-05	0.0172611	6.32022e-05	0.0171249	7.85119e-05	0.0171588	7.96531e-05	0.0172332	2.09636e-05	0.017176	2.8794e-05	0.0172411	2.93711e-05	0.017191	4.97169e-05	0.0159975	0.000778886
Filled Symbols	TRUE	0.0172503	8.39561e-06			0.0155032	0.00103984	0.016238	0.00012831	0.0167098	6.88257e-05	0.0171777	2.52347e-05	0.0171272	9.9181e-05	0.0170462	4.4584e-05	0.0172066	2.91479e-05	0.0172316	2.59108e-05	0.0170886	6.37262e-05	0.0172126	6.23426e-05	0.0170574	7.7462e-05	0.0170897	7.81997e-05	0.0171995	2.06826e-05	0.0171417	2.84239e-05	0.0172034	2.89859e-05	0.0171492	4.90884e-05	0.0158375	0.000769378
ConcAge	FALSE	0.0171933	1.22387e-05			0.0154195	0.00103305	0.0161957	0.000127163	0.0166725	6.7936e-05	0.01715	2.46688e-05	0.0170564	9.69813e-05	0.0170143	4.40157e-05	0.0171732	2.85106e-05	0.0171933	2.53108e-05	0.0170248	6.14107e-05	0.0171658	6.06439e-05	0.0169922	7.53876e-05	0.017023	7.53264e-05	0.017167	2.0127e-05	0.0171085	2.76922e-05	0.017167	2.82247e-05	0.0171088	4.78463e-05	0.0156828	0.000750655
ConcSwap	FALSE	0.0172602	1.21486e-05			0.0153406	0.0010231	0.0161557	0.000125477	0.0166373	6.6627e-05	0.017124	2.38361e-05	0.0169896	9.37447e-05	0.0169842	4.31794e-05	0.0171418	2.75729e-05	0.0171572	2.44278e-05	0.0169647	5.80026e-05	0.0171216	5.8144e-05	0.0169307	7.2335e-05	0.0169601	7.10975e-05	0.0171363	1.93094e-05	0.0170773	2.66153e-05	0.0171326	2.71043e-05	0.0170707	4.60185e-05	0.015537	0.000723133
1st Symbol-row	1	0.0172121	2.1624e-05			0.0152682	0.0010102	0.0161191	0.000123289	0.016605	6.49279e-05	0.0171001	2.27551e-05	0.0169284	8.95433e-05	0.0169567	4.20939e-05	0.017113	2.63558e-05	0.017124	2.32816e-05	0.0169095	5.3578e-05	0.0170812	5.48988e-05	0.0168742	6.83724e-05	0.0169024	6.56075e-05	0.0171081	1.8248e-05	0.0170487	2.52172e-05	0.0171011	2.56498e-05	0.0170358	4.36458e-05	0.0154032	0.000687428
		0.0160786	0.000356798			0.015204	0.00099466	0.0160866	0.000120649	0.0165763	6.28767e-05	0.0170789	2.145e-05	0.0168741	8.4471e-05	0.0169322	4.07835e-05	0.0170874	2.48863e-05	0.0170946	2.18978e-05	0.0168606	4.82357e-05	0.0170452	5.09807e-05	0.0168242	6.35884e-05	0.0168512	5.8979e-05	0.0170831	1.69666e-05	0.0170232	2.35293e-05	0.0170732	2.38938e-05	0.0170049	4.07811e-05	0.0152846	0.000644337
		IsoLine	IsoLine			0.0151494	0.00097681	0.016059	0.000117614	0.016552	6.05191e-05	0.0170609	1.99499e-05	0.0168279	7.86413e-05	0.0169114	3.92773e-05	0.0170656	2.31974e-05	0.0170697	2.03073e-05	0.016819	4.2095e-05	0.0170147	4.64774e-05	0.0167816	5.80898e-05	0.0168076	5.136e-05	0.0170619	1.54936e-05	0.0170016	2.15891e-05	0.0170494	2.18754e-05	0.0169785	3.74884e-05	0.0151837	0.000594823
						0.0151056	0.000957055	0.0160368	0.000114254	0.0165325	5.79079e-05	0.0170464	1.82884e-05	0.0167908	7.21842e-05	0.0168948	3.76092e-05	0.0170482	2.13267e-05	0.0170496	1.85456e-05	0.0167856	3.52932e-05	0.0169902	4.14893e-05	0.0167475	5.19995e-05	0.0167727	4.29208e-05	0.0170449	1.38621e-05	0.0169843	1.944e-05	0.0170303	1.96397e-05	0.0169574	3.38414e-05	0.0151028	0.000539991
						0.0150736	0.000935836	0.0160206	0.000110643	0.0165182	5.51013e-05	0.0170359	1.65026e-05	0.0167637	6.5244e-05	0.0168826	3.58162e-05	0.0170355	1.93161e-05	0.017035	1.66521e-05	0.0167612	2.79821e-05	0.0169723	3.61279e-05	0.0167226	4.54534e-05	0.0167472	3.38498e-05	0.0170324	1.21085e-05	0.0169716	1.71301e-05	0.0170164	1.72366e-05	0.0169419	2.99215e-05	0.0150437	0.000481068
						0.0150541	0.000913626	0.0160107	0.000106861	0.0165095	5.21622e-05	0.0170294	1.46324e-05	0.0167472	5.79758e-05	0.0168752	3.39385e-05	0.0170277	1.72105e-05	0.017026	1.4669e-05	0.0167464	2.03252e-05	0.0169614	3.0513e-05	0.0167074	3.85979e-05	0.0167316	2.43498e-05	0.0170248	1.0272e-05	0.0169639	1.47109e-05	0.0170079	1.47199e-05	0.0169325	2.58162e-05	0.0150077	0.000419369
						0.0150476	0.000890922	0.0160074	0.000102994	0.0165066	4.9156e-05	0.0170273	1.27195e-05	0.0167417	5.05419e-05	0.0168727	3.2018e-05	0.0170251	1.50568e-05	0.017023	1.26407e-05	0.0167414	1.24933e-05	0.0169577	2.47701e-05	0.0167023	3.1586e-05	0.0167264	1.46328e-05	0.0170223	8.39351e-06	0.0169613	1.22365e-05	0.0170051	1.21458e-05	0.0169294	2.16173e-05	0.0149956	0.000356272
						0.0150542	0.000868231	0.0160107	9.91272e-05	0.0165095	4.61501e-05	0.0170294	1.08066e-05	0.0167472	4.31083e-05	0.0168752	3.00977e-05	0.0170277	1.29033e-05	0.017026	1.06125e-05	0.0167464	4.66159e-06	0.0169614	1.90273e-05	0.0167074	2.45744e-05	0.0167316	4.91607e-06	0.0170248	6.51509e-06	0.0169639	9.76208e-06	0.0170079	9.57168e-06	0.0169325	1.74185e-05	0.0150078	0.000293186
						0.0150737	0.00084606	0.0160206	9.53475e-05	0.0165182	4.32114e-05	0.0170359	8.93659e-06	0.0167637	3.58412e-05	0.0168826	2.82203e-05	0.0170355	1.07979e-05	0.017035	8.62961e-06	0.0167554	0	0.0169723	1.34129e-05	0.0167226	1.77197e-05	0.0167397	0	0.0170324	4.67868e-06	0.0169716	7.34303e-06	0.0170164	7.05516e-06	0.0169419	1.33137e-05	0.0150438	0.000231522
						0.0151057	0.000824904	0.0160368	9.17393e-05	0.0165325	4.04057e-05	0.0170464	7.15114e-06	0.0167908	2.89029e-05	0.0168948	2.64279e-05	0.0170482	8.78786e-06	0.0170496	6.73644e-06	0.0176204	0	0.0169902	8.05252e-06	0.0167475	1.1175e-05	0.0176478	0	0.0170449	2.9253e-06	0.0169843	5.03335e-06	0.0170303	4.65242e-06	0.0169574	9.39447e-06	0.015103	0.000172656
						0.0151495	0.000805236	0.016059	8.8383e-05	0.016552	3.77957e-05	0.0170609	5.49015e-06	0.0168279	2.24483e-05	0.0169114	2.47605e-05	0.0170656	6.91793e-06	0.0170697	4.97523e-06	0.0176295	4.66885e-06	0.0170147	3.06573e-06	0.0167816	5.08663e-06	0.0176559	4.93183e-06	0.0170619	1.29412e-06	0.0170016	2.88461e-06	0.0170494	2.41713e-06	0.0169785	5.74846e-06	0.0151839	0.000117904
						0.0152042	0.000787494	0.0160866	8.53538e-05	0.0165763	3.54396e-05	0.0170789	3.99072e-06	0.0168741	1.66217e-05	0.0169322	2.32553e-05	0.0170874	5.22992e-06	0.0170946	3.38533e-06	0.0176345	1.25007e-05	0.0170355	0	0.016821	0	0.0176611	1.46488e-05	0.0170806	0	0.0170232	9.44832e-07	0.0170732	3.99229e-07	0.0170049	2.45708e-06	0.0152849	6.84878e-05
						0.0152684	0.000772076	0.0161191	8.27192e-05	0.016605	3.33901e-05	0.0171001	2.68636e-06	0.0169284	1.15531e-05	0.0169567	2.1946e-05	0.017113	3.76153e-06	0.017124	2.00225e-06	ErrEll	ErrEll	0.0175356	0	0.0174969	0	ErrEll	ErrEll	0.0174199	0	0.0170375	0	0.0170795	0	0.0170314	0	0.0154036	2.55123e-05
						0.0153408	0.000759326	0.0161557	8.05381e-05	0.0166373	3.1693e-05	0.017124	1.60619e-06	0.0169896	7.35592e-06	0.0169842	2.08617e-05	0.0171418	2.54557e-06	0.0171572	8.56887e-07	ClippedEllipse	ClippedEllipse	0.0175565	3.07992e-06	0.0175365	5.10825e-06	ClippedEllipse	ClippedEllipse	0.0174386	1.2976e-06	0.0173491	0	0.0174407	0	0.0173927	0	0.0154995	0
						0.0154198	0.000749528	0.0161957	7.88593e-05	0.0166725	3.03861e-05	0.01715	7.74352e-07	0.0170564	4.12378e-06	0.0170143	2.00268e-05	0.0171732	1.6092e-06	0.0171922	0			0.017581	8.068e-06	0.0175706	1.11986e-05			0.0174557	2.92909e-06	0.0173634	9.48059e-07	0.0174472	4.03334e-07	0.0174193	2.46687e-06	0.016656	0
						0.0155035	0.000742902	0.016238	7.77202e-05	0.0167098	2.94987e-05	0.0171777	2.09422e-07	0.0171272	1.92892e-06	0.0170462	1.94599e-05	0.0172066	9.73332e-07	0.0173902	0			0.0175989	1.34294e-05	0.0175955	1.77447e-05			0.0174681	4.6827e-06	0.017385	2.88825e-06	0.0174709	2.42176e-06	0.0174457	5.75949e-06	0.0167541	2.6169e-05
						0.0155902	0.000739595	0.0162819	7.71463e-05	0.0167484	2.90506e-05	0.0171987	0	0.0172004	8.20363e-07	0.0170792	1.91736e-05	0.0172411	6.52177e-07	0.0174254	8.60197e-07			0.0176098	1.90443e-05	0.0176107	2.46002e-05			0.0174757	6.51925e-06	0.0174023	5.03731e-06	0.01749	4.65747e-06	0.0174668	9.4065e-06	0.0168727	6.926e-05
						0.0156778	0.000739682	0.0163262	7.71504e-05	0.0167875	2.90518e-05	0.0172427	0	0.0172746	8.22882e-07	0.0171125	1.91744e-05	0.0172759	6.52907e-07	0.0174585	2.00637e-06			0.0176134	2.47872e-05	0.0176158	3.16121e-05			0.0174782	8.39772e-06	0.017415	7.34724e-06	0.0175039	7.06051e-06	0.0174823	1.33264e-05	0.0169736	0.000118774
						0.0157644	0.00074316	0.01637	7.77324e-05	0.0168261	2.95023e-05	0.0172638	2.10916e-07	0.0173478	1.93642e-06	0.0171455	1.94622e-05	0.0173104	9.75505e-07	0.0174879	3.39018e-06			ErrEll	ErrEll	ErrEll	ErrEll			ErrEll	ErrEll	0.0174227	9.76644e-06	0.0175124	9.57721e-06	0.0174917	1.74317e-05	0.0170545	0.000173605
						0.0158481	0.000749951	0.0164124	7.88793e-05	0.0168634	3.03919e-05	0.0172914	7.76806e-07	0.0174186	4.13609e-06	0.0171774	2.00306e-05	0.0173438	1.61277e-06	0.0175129	4.9807e-06			ClippedEllipse	ClippedEllipse	ClippedEllipse	ClippedEllipse			ClippedEllipse	ClippedEllipse	0.0174253	1.22409e-05	0.0175152	1.21514e-05	0.0174948	2.16306e-05	0.0171136	0.000232529
						0.0159271	0.000759905	0.0164523	8.05655e-05	0.0168986	3.17009e-05	0.0173174	1.60955e-06	0.0174854	7.37278e-06	0.0172074	2.08668e-05	0.0173752	2.55045e-06	0.0175329	6.7424e-06											ErrEll	ErrEll	ErrEll	ErrEll	ErrEll	ErrEll	0.0171496	0.000294228
						0.0159994	0.000772798	0.016489	8.27533e-05	0.0169309	3.34e-05	0.0173413	2.69055e-06	0.0175466	1.15742e-05	0.017235	2.19523e-05	0.017404	3.76762e-06	0.0175476	8.63594e-06											ClippedEllipse	ClippedEllipse	ClippedEllipse	ClippedEllipse	ClippedEllipse	ClippedEllipse	0.0171617	0.000357325
						0.0160636	0.000788343	0.0165215	8.53939e-05	0.0169596	3.54513e-05	0.0173625	3.99565e-06	0.0176009	1.66464e-05	0.0172594	2.32627e-05	0.0174296	5.23708e-06	0.0175565	1.0619e-05																	ErrEll	ErrEll
						0.0161183	0.000806192	0.0165491	8.84282e-05	0.0169839	3.78088e-05	0.0173806	5.4957e-06	0.0176471	2.24762e-05	0.0172802	2.47689e-05	0.0174514	6.926e-06	0.0175595	1.26473e-05																	ClippedEllipse	ClippedEllipse
						0.016162	0.000825947	0.0165713	9.17885e-05	0.0170034	4.042e-05	0.017395	7.15719e-06	0.0176842	2.89333e-05	0.0172969	2.6437e-05	0.0174688	8.79666e-06	ErrEll	ErrEll
						0.016194	0.000847167	0.0165874	9.53998e-05	0.0170177	4.32266e-05	0.0174056	8.94301e-06	0.0177113	3.58734e-05	0.0173091	2.823e-05	0.0174816	1.08073e-05	ClippedEllipse	ClippedEllipse
						0.0162135	0.000869376	0.0165973	9.91813e-05	0.0170264	4.61657e-05	0.017412	1.08133e-05	0.0177278	4.31417e-05	0.0173165	3.01077e-05	0.0174893	1.29129e-05
						0.01622	0.00089208	0.0166006	0.000103049	0.0170293	4.91719e-05	0.0174142	1.27262e-05	0.0177333	5.05756e-05	0.017319	3.20282e-05	0.0174919	1.50666e-05
						ErrEll	ErrEll	ErrEll	ErrEll	ErrEll	ErrEll	ErrEll	ErrEll	ErrEll	ErrEll	ErrEll	ErrEll	ErrEll	ErrEll
												ClippedEllipse	ClippedEllipse	ClippedEllipse	ClippedEllipse	ClippedEllipse	ClippedEllipse	ClippedEllipse	ClippedEllipse

## Sheet: Corr Plot
			Inverse isochron (Correlation Plot)
Step no	Power	Residuals	39Ar/40Ar	±	36Ar/40Ar	±	r
	(Watts)			(1 s)		(1 s)
1	0.5		0.0156338	0.000239494	0.000891501	6.22163e-05	0.00354485
2	1		0.016304	0.000121173	0.000103021	1.05997e-05	0.00104554
3	1.5		0.016768	0.000106783	4.9164e-05	8.23989e-06	0.000390758
4	1.75		0.0172207	7.90292e-05	1.27228e-05	5.24337e-06	0.000260546
5	2		0.0172375	0.000202551	5.05587e-05	2.03765e-05	0.000334485
6	2.25		0.0170958	9.11737e-05	3.20231e-05	5.26407e-06	0.000393127
7	2.5		0.0172585	9.53614e-05	1.50617e-05	5.9032e-06	0.000336586
8	2.75		0.0172913	0.000109576	1.2644e-05	5.55968e-06	0.000242623
9	3		0.0171879	0.000182422	1.2497e-05	2.14677e-05	6.89637e-05
10	3.25		0.0172856	0.000133947	2.47786e-05	1.57418e-05	0.000219887
11	3.5		0.017159	0.000186617	3.1599e-05	1.92199e-05	0.000275249
12	3.68		0.0171937	0.000190923	1.46408e-05	2.66348e-05	0.000119826
13	3.85		0.0172503	9.3139e-05	8.39561e-06	5.14899e-06	0.000166492
14	4.01		0.0171933	9.4777e-05	1.22387e-05	6.78255e-06	0.000131902
15	4.16		0.0172602	0.000104213	1.21486e-05	7.05588e-06	0.000161358
16	4.25		0.0172121	0.000115502	2.1624e-05	1.15095e-05	0.000234625
17	7		0.0160786	0.000442454	0.000356798	0.000172939	0.00105415

## Sheet: Corr Vol
Atmospheric ratios						Production ratios								Decay Constants*				Correction factors
				±			±			±									±
36/38Atms=	5.32278	40/39K=	0.0302	0.00091	39/37Ca=	0.000706	2.8e-05	36/37Ca=	0.000279	8.4e-06			Lambda40=	5.543e-10	Lambda39=	7.0554e-06	ClK fact=	0.23	0.02
40/36Atms=	295.5	38/39K=	0.014	0	38/37Ca=	3.17e-05	2e-07	36/39Ca=	0.395184	0.0196776	36/38Cl=	316	Lambda37=	0.019748	Lambda Cl=	2.303e-06	CaK fact=	1.83	0.085
Ca fact	24.9961	DefCacorr	500		40/36Meas	291.806			SUM 39ArK	69367.5		SUM 40Ar*	4.00576e+06		*Note	40 decay is in years						141.633
Default volume if -ve =		0.01	Volumes * 10-13 cm3													37, 39 and Cl are in days						141.623
Parker	Phlogopite		Ar isotopes derived from Calcium						Ar isotopes derived from Potassium							Ar isotopes derived from Chlorine			Ar isotopes derived from Atmosphere					Radiogenic Argon
Step	T Out (Days)	39	± (1s)	38	± (1s)	36	± (1s)	40	± (1s)	39	± (1s)	38	± (1s)	38	± (1s)	36	± (1s)	40	± (1s)	38	± (1s)	36	± (1s)	40*	± (1s)
1	161.728	0.0160202	0.0085295	0.000719321	0.000381945	0.00633093	0.00336676	2.41537	0.0815111	79.9792	1.21527	1.11971	0.0170137	28.6799	1.13256	0.00924174	0.000364953	1347.7	94.0167	0.856831	0.0597735	4.56073	0.318162	3768.09	94.5427
2	161.744	0.0157705	0.00900527	0.00070811	0.000403393	0.00623227	0.0035551	11.5912	0.35959	383.815	2.83183	5.37341	0.0396457	26.3788	1.47354	0.00850107	0.000474875	716.657	73.7332	0.455633	0.0468777	2.42524	0.24952	22824.5	76.6789
3	161.757	0.103205	0.0445297	0.00463399	0.00199117	0.040785	0.0175659	106.382	3.27563	3522.57	22.317	49.316	0.312439	202.171	6.49979	0.0651589	0.00209485	3052	511.511	1.94038	0.325206	10.3282	1.731	207026	529.198
4	161.774	0.0472612	0.0571036	0.00212207	0.00256265	0.0186769	0.0225613	119.903	3.65367	3970.3	18.0061	55.5842	0.252085	214.298	7.86982	0.0690744	0.00253667	866.788	357.223	0.551082	0.227113	2.93329	1.20888	229687	392.176
5	161.789	7.06e-06	0.281009	3.17e-07	0.0126175	2.79e-06	0.11105	183.163	5.91946	6064.99	70.8574	84.9098	0.992004	348.946	27.3526	0.112486	0.00881732	5256.65	2118.56	3.34205	1.34693	17.789	7.16941	346592	2164.35
6	161.804	0.0815507	0.0482499	0.0036617	0.00216171	0.0322275	0.0190494	121.698	3.72337	4029.74	21.3604	56.4164	0.299045	223.912	8.53584	0.0721864	0.00275185	2230.53	366.66	1.41811	0.233113	7.54832	1.24081	233484	391.903
7	161.819	0.0782424	0.0385898	0.00351315	0.00172724	0.0309202	0.0152292	97.2752	2.97886	3221.03	17.584	45.0945	0.246176	175.255	5.6323	0.0565054	0.00181595	830.66	325.564	0.528113	0.206986	2.81103	1.10174	185804	362.467
8	161.833	0.0639433	0.0405964	0.00287111	0.00181934	0.0252694	0.0160298	104.644	3.22099	3465.02	21.7725	48.5102	0.304815	192.748	7.15457	0.062151	0.00230697	748.722	329.219	0.476019	0.209309	2.53375	1.11411	199642	368.149
9	161.85	7.06e-06	0.409786	3.17e-07	0.0183998	2.79e-06	0.161941	244.169	7.79566	8085.08	85.3297	113.191	1.19462	469.415	35.6556	0.151377	0.0114982	1737.1	2984.03	1.1044	1.89717	5.87851	10.0982	468656	3030.29
10	161.865	0.410735	0.326258	0.0184424	0.0146314	0.162316	0.128864	375.068	11.6629	12419.5	95.3675	173.873	1.33515	692.619	43.2263	0.223377	0.0139409	5260.83	3342.19	3.34471	2.12488	17.8032	11.3103	713227	3424.77
11	161.882	0.439775	0.298858	0.0197463	0.0133967	0.173792	0.118019	234.168	7.49494	7753.92	83.6778	108.555	1.17149	433.131	20.9873	0.139703	0.00676931	4219.49	2566.46	2.68265	1.63169	14.2791	8.68516	447666	2637.91
12	161.898	0.131482	0.35147	0.00590364	0.0157796	0.0519594	0.138889	201.162	6.45242	6661.01	73.2358	93.2541	1.0253	362.341	26.8661	0.116883	0.0086664	1676.07	3049.13	1.0656	1.93856	5.67197	10.3185	385733	3108.13
13	161.914	0.0554974	0.0653703	0.00249188	0.00293356	0.0219317	0.0258271	162.448	4.97144	5379.06	28.7671	75.3068	0.40274	300.97	11.1689	0.0970955	0.00360319	773.608	474.449	0.491841	0.301643	2.61796	1.60558	311051	527.929
14	161.93	0.0509396	0.0367757	0.00228723	0.00164883	0.0201305	0.0145239	79.4194	2.43229	2629.78	14.4001	36.8169	0.201601	148.283	5.52684	0.047842	0.00178317	553.161	306.557	0.351686	0.194901	1.87195	1.03742	152401	321.565
15	161.944	0.0249337	0.0221122	0.00111955	0.000991891	0.00985341	0.00873471	38.0318	1.16842	1259.33	7.54435	17.6306	0.105621	69.7214	3.52004	0.0224969	0.00113581	261.925	152.126	0.166526	0.096718	0.88638	0.514809	72699.8	161.724
16	161.959	7.06e-06	0.00947469	3.17e-07	0.000425422	2.79e-06	0.00374425	12.6975	0.391807	420.447	2.79504	5.88626	0.0391306	22.9104	1.06602	0.00739316	0.000344004	156.088	83.0786	0.099237	0.0528193	0.528217	0.281146	24271.3	86.0354
17	161.973	7.06e-06	0.00752466	3.17e-07	0.000337864	2.79e-06	0.00297363	0.663903	0.0269772	21.9835	0.599302	0.307769	0.00839023	1.38763	0.320688	0.000447824	0.000103494	144.154	69.8692	0.0916499	0.0444211	0.487832	0.236444	1223.1	70.057

## Sheet: Volumes
						True volumes corrected (mv)
																		Extraction blank (mv)
Step			40 meas	± (1s)	39 meas	± (1s)	38 meas	± (1s)	37 meas	± (1s)	36 meas	± (1s)		40	±	39	±	38	±	37	±	36	±
1			5118.2	9.95869	79.9952	1.21524	30.6571	1.13078	22.6915	12.0479	4.5763	0.318144		31.7932	0.610921	0.19307	0.060022	0.097135	0.086631	0.099836	0.066224	0.093234	0.049818
2			23552.7	21.0462	383.831	2.83182	32.2086	1.47217	22.3379	12.7245	2.43997	0.249494		32.0232	0.615341	0.194467	0.060456	0.097838	0.087258	0.100558	0.066703	0.093908	0.050178
3			210184	135.63	3522.67	22.317	253.432	6.48373	146.183	62.8062	10.4342	1.73091		32.282	0.620313	0.196038	0.060944	0.098628	0.087963	0.101371	0.067242	0.094667	0.050584
4			230674	161.803	3970.35	18.006	270.435	7.86202	66.9422	80.8397	3.02104	1.20866		32.0577	0.616004	0.194676	0.060521	0.097943	0.087352	0.100667	0.066775	0.094009	0.050232
5			352031	442.795	6064.99	70.8568	437.198	27.2997	0.01	398.029	17.9015	7.16854		27.4863	0.528161	0.166915	0.051891	0.083976	0.074896	0.086312	0.057253	0.080604	0.043069
6			235836	138.329	4029.82	21.3603	281.75	8.52689	115.511	68.1889	7.65273	1.24066		31.9082	0.613131	0.193768	0.060239	0.097487	0.086945	0.100197	0.066464	0.093571	0.049998
7			186732	159.315	3221.11	17.584	220.881	5.62276	110.825	54.4827	2.89846	1.10163		31.7472	0.610037	0.19279	0.059935	0.096995	0.086506	0.099692	0.066128	0.093099	0.049746
8			200496	164.736	3465.08	21.7724	241.737	7.14457	90.5712	57.3897	2.62117	1.11399		31.9772	0.614457	0.194187	0.060369	0.097697	0.087133	0.100414	0.066607	0.093773	0.050106
9			470637	527.399	8085.08	85.3287	583.71	35.5829	0.01	580.434	6.02989	10.0969		27.8888	0.535896	0.16936	0.052651	0.085206	0.075992	0.087576	0.058091	0.081784	0.0437
10			718863	747.443	12419.9	95.367	869.855	43.1508	581.778	461.545	18.1889	11.3095		27.6588	0.531476	0.167963	0.052216	0.084504	0.075366	0.086853	0.057612	0.081109	0.04334
11			452120	609.712	7754.36	83.6772	544.388	20.8896	622.91	422.59	14.5926	8.68435		27.6645	0.531586	0.167998	0.052227	0.084521	0.075381	0.086871	0.057624	0.081126	0.043349
12			387610	602.709	6661.14	73.235	456.667	26.7749	186.235	497.778	5.84082	10.3176		27.7968	0.534128	0.168801	0.052477	0.084925	0.075742	0.087287	0.0579	0.081514	0.043556
13			311987	231.478	5379.11	28.7671	376.772	11.1569	78.6082	92.54	2.73699	1.60537		31.7644	0.610369	0.192895	0.059967	0.097047	0.086553	0.099746	0.066164	0.093149	0.049773
14			153033	97.0626	2629.83	14.4	185.454	5.51939	72.1524	52.0115	1.93992	1.03731		32.0692	0.616225	0.194746	0.060543	0.097978	0.087383	0.100703	0.066799	0.094043	0.050251
15			72999.8	54.8712	1259.36	7.54431	87.5197	3.51691	35.3169	31.2891	0.91873	0.514734		32.397	0.622523	0.196736	0.061162	0.09898	0.088277	0.101732	0.067482	0.095004	0.050764
16			24440.1	22.3581	420.447	2.79502	28.8959	1.06393	0.01	13.4202	0.535613	0.281121		31.9485	0.613904	0.194013	0.060315	0.097609	0.087054	0.100324	0.066547	0.093689	0.050061
17			1367.91	5.12669	21.9835	0.599255	1.78705	0.317466	0.01	10.6582	0.488283	0.236425		31.8967	0.61291	0.193698	0.060217	0.097451	0.086913	0.100161	0.06644	0.093537	0.04998
