# Supplementary material
Source: MDPI journal article supplement (https://www.mdpi.com/2075-163X/9/10/613)
Supplement: s1 [file s1 › Supplementary Files/Table-S2-D-649 Parker Phlogopite2 v9e.xls]

## Sheet: DT_Values
Sample no	Mineral		J	± (1s)	% error		Int Age (Ma)	± (2 s)	with ± in J		Plateau Age	± (2s)	with ± in J	MSWD	% 39Ar
Parker	Phlogopite		0.015287	3.3e-05	0.21587		1126.7	3.23601	4.85392		1118.44	4.73243	5.9453	0.286558	45.2313	Probability	Initial Ratio	Initial Ratio Error
Can/Pos	213/BM2	D-649r								IsoPlot PA-->	1134.8	4.2		0.46	54.5	0.84	na	na
						Decay corrected true ratios				IsoPlot CA-->	1130	8	na	4.2	100	0	254	13
Step no	Power	40Ar/39Ar	±	38Ar/39Ar	±	37Ar/39Ar	±	36Ar/39Ar	±	40Ar*/39Ar(K)	±	40Ar*	Cumulative	Age	±	Ca/K	±	Cl/K	±
	(%)		(1 s)		(1 s)		(1 s)		(1 s)		(1 s)	(%)	39Ar (%)	(Ma)	(1 s)		(1 s)		(1 s)
1	0.5	128.825	2.19688	0.533227	0.0211168	0.279933	0.320976	0.28739	0.00996973	43.9506	2.6821	34.1097	0.274669	927.195	44.2434	0.512379	0.587985	0.107034	0.0104564
2	1	65.4466	0.584234	0.109335	0.00427383	0.482813	0.0900823	0.0294797	0.0018241	56.7735	0.736852	86.7183	1.41706	1127.21	10.8794	0.88385	0.16994	0.020665	0.00204618
3	1.25	61.1971	0.326697	0.077614	0.0028253	0.172207	0.044007	0.0124321	0.000737093	57.5207	0.37645	93.9811	3.6057	1138.21	5.52439	0.315178	0.0818622	0.0140979	0.0013868
4	1.5	59.1951	0.368145	0.0713092	0.00231823	0.0696967	0.0393513	0.00484721	0.0005098	57.7469	0.38955	97.5487	11.3984	1141.53	5.70613	0.127551	0.0722598	0.0129736	0.00124664
5	1.75	58.1218	0.341759	0.0711706	0.00284641	0.0393415	0.0257319	0.00327157	0.000403469	57.1355	0.356515	98.3003	20.5265	1132.55	5.24829	0.0719969	0.0472093	0.0130094	0.00130602
6	2	57.6537	0.306662	0.0701113	0.00301148	0.0165197	0.025709	0.0016926	0.000416052	57.1311	0.327872	99.0923	33.9439	1132.48	4.8268	0.0302313	0.047069	0.0128336	0.00131269
7	2.25	57.5397	0.293801	0.0695354	0.00195078	0.0195068	0.0228301	0.000919325	0.000398942	57.2459	0.315234	99.488	48.7713	1134.17	4.63642	0.035698	0.0418125	0.0127346	0.00119406
8	2.37	59.034	0.354975	0.0769064	0.00256198	0.072327	0.0259222	0.00616972	0.000529391	57.1958	0.377902	96.8813	54.7686	1133.44	5.56038	0.132365	0.0478367	0.014204	0.00136741
9	2.42	56.6005	0.296078	0.0731327	0.00244935	0.0599895	0.0263921	0.000714479	0.000475889	56.3725	0.326751	99.593	61.309	1121.28	4.84026	0.109785	0.048568	0.0135715	0.00130699
10	2.47	56.394	0.29989	0.0754698	0.0018292	0.10346	0.0245348	0.000192155	0.000449501	56.326	0.327698	99.872	71.7109	1120.59	4.85615	0.189346	0.0457552	0.0141324	0.00129812
11	2.58	56.1895	0.322487	0.0763101	0.00206266	0.073715	0.0331756	0.000621307	0.000340251	55.9911	0.336759	99.6417	78.4824	1115.62	5.0042	0.134906	0.061037	0.0143067	0.00133042
12	2.67	56.2028	0.349244	0.12658	0.00277519	0.365389	0.0347119	0.000822481	0.000356	55.9856	0.363576	99.5879	86.0892	1115.54	5.40293	0.668835	0.0707272	0.0258687	0.002337
13	3	56.3575	0.327626	0.0705362	0.00213606	0.0553245	0.0229113	0.000537491	0.000372893	56.181	0.344722	99.6829	100	1118.44	5.11452	0.101248	0.0421922	0.0129819	0.00123012

## Sheet: PlotDat2
Source sheet	Data table	0	838.709	0	1134.8	0.274669	927.195
Plot name	ArStepHeat1	0.274669	838.709	100	1134.8	0.274669	1127.21
Plot Type	18	0.274669	1015.68			ShapeLine	ShapeLine
1st free col	9	0	1015.68
Sigma Level	1	0	838.709
Absolute Errs	TRUE	ErrBox	ErrBox
Symbol Type	1	0.274669	1105.45
Inverse Plot	TRUE	1.41706	1105.45
Color Plot	TRUE	1.41706	1148.97
3D plot	FALSE	0.274669	1148.97
Linear	FALSE	0.274669	1105.45
Data Range	N5:P19	ErrBox	ErrBox
Filled Symbols	TRUE	1.41706	1127.16
ConcAge	FALSE	3.6057	1127.16
ConcSwap	FALSE	3.6057	1149.26
1st Symbol-row	1	1.41706	1149.26
		1.41706	1127.16
		ErrBox	ErrBox
		3.6057	1130.11
		11.3984	1130.11
		11.3984	1152.94
		3.6057	1152.94
		3.6057	1130.11
		ErrBox	ErrBox
		11.3984	1122.05
		20.5265	1122.05
		20.5265	1143.04
		11.3984	1143.04
		11.3984	1122.05
		ErrBox	ErrBox
		20.5265	1122.83
		33.9439	1122.83
		33.9439	1142.14
		20.5265	1142.14
		20.5265	1122.83
		ErrBox	ErrBox
		33.9439	1124.9
		48.7713	1124.9
		48.7713	1143.44
		33.9439	1143.44
		33.9439	1124.9
		ErrBox	ErrBox
		48.7713	1122.31
		54.7686	1122.31
		54.7686	1144.56
		48.7713	1144.56
		48.7713	1122.31
		ErrBox	ErrBox
		54.7686	1111.6
		61.309	1111.6
		61.309	1130.96
		54.7686	1130.96
		54.7686	1111.6
		ErrBox	ErrBox
		61.309	1110.88
		71.7109	1110.88
		71.7109	1130.3
		61.309	1130.3
		61.309	1110.88
		ErrBox	ErrBox
		71.7109	1105.61
		78.4824	1105.61
		78.4824	1125.63
		71.7109	1125.63
		71.7109	1105.61
		ErrBox	ErrBox
		78.4824	1104.73
		86.0892	1104.73
		86.0892	1126.35
		78.4824	1126.35
		78.4824	1104.73
		ErrBox	ErrBox
		86.0892	1108.21
		100	1108.21
		100	1128.67
		86.0892	1128.67
		86.0892	1108.21
		ErrBox	ErrBox

## Sheet: PlotDat3
Source sheet	Corr Plot	0.00776274	0.00222952	0.005	0.00282047	0.00808686	0.00223044	0.0156155	0.000448242	0.0165604	0.000202182	0.0171584	8.1292e-05	0.0174615	5.57993e-05	0.0175798	2.8967e-05	0.0176055	1.55643e-05	0.0171967	0.000103891	0.0179027	1.19771e-05	0.0179715	2.52025e-06	0.0180557	1.0316e-05	0.0180685	1.21364e-05	0.0180053	8.92306e-06
Plot name	Isochron2	0.0152815	0.000448112	0.0175589	0	0.00808317	0.00225508	0.0156118	0.000458311	0.016558	0.000206561	0.0171555	8.44307e-05	0.0174587	5.83306e-05	0.0175772	3.16008e-05	0.0176031	1.80951e-05	0.0171939	0.000107156	0.0179002	1.50463e-05	0.0179689	5.43e-06	0.0180529	1.2527e-05	0.0180654	1.44492e-05	0.0180025	1.13385e-05
Plot Type	2	0.0163467	0.000202116			0.00807232	0.00227915	0.0156007	0.000468152	0.0165509	0.000210841	0.017147	8.74987e-05	0.0174505	6.08052e-05	0.0175697	3.41755e-05	0.0175959	2.05693e-05	0.0171856	0.000110348	0.0178927	1.80468e-05	0.0179613	8.27473e-06	0.0180446	1.46886e-05	0.0180564	1.67102e-05	0.0179941	1.36998e-05
1st free col	33	0.0169011	8.12686e-05			0.00805456	0.00230211	0.0155824	0.000477545	0.0165392	0.000214926	0.0171329	9.04276e-05	0.0174369	6.31678e-05	0.0175574	3.66337e-05	0.017584	2.29315e-05	0.0171719	0.000113395	0.0178803	2.09117e-05	0.0179486	1.09909e-05	0.0180309	1.67524e-05	0.0180417	1.8869e-05	0.0179803	1.59545e-05
Sigma Level	1	0.0172137	5.57915e-05			0.00803028	0.00232344	0.0155574	0.00048628	0.0165232	0.000218725	0.0171137	9.31518e-05	0.0174184	6.53656e-05	0.0175405	3.89204e-05	0.0175678	2.5129e-05	0.0171533	0.000116229	0.0178634	2.35769e-05	0.0179314	1.35178e-05	0.0180123	1.86724e-05	0.0180214	2.08774e-05	0.0179614	1.8052e-05
Absolute Errs	TRUE	0.0173538	2.89584e-05			0.00800002	0.00234269	0.0155263	0.000494163	0.0165033	0.000222152	0.0170897	9.56107e-05	0.0173953	6.73495e-05	0.0175195	4.09846e-05	0.0175475	2.71126e-05	0.0171301	0.000118786	0.0178423	2.59829e-05	0.0179099	1.57991e-05	0.0179889	2.04056e-05	0.0179962	2.26905e-05	0.0179379	1.99456e-05
Symbol Type	1	0.0173882	1.55578e-05			0.00796446	0.0023594	0.0154897	0.000501017	0.0164799	0.000225133	0.0170615	9.77491e-05	0.0173682	6.90753e-05	0.0174947	4.27802e-05	0.0175237	2.88382e-05	0.0171027	0.000121011	0.0178175	2.8076e-05	0.0178846	1.77837e-05	0.0179615	2.19134e-05	0.0179665	2.42677e-05	0.0179102	2.15929e-05
Inverse Plot	TRUE	0.0169472	0.00010386			0.00792439	0.00237321	0.0154485	0.00050669	0.0164535	0.000227599	0.0170297	9.95194e-05	0.0173376	7.05043e-05	0.0174668	4.4267e-05	0.0174969	3.02671e-05	0.0170719	0.000122852	0.0177896	2.98093e-05	0.017856	1.94274e-05	0.0179306	2.31622e-05	0.0179331	2.55739e-05	0.017879	2.29572e-05
Color Plot	TRUE	0.0176764	1.1973e-05			0.00788072	0.00238381	0.0154035	0.000511054	0.0164248	0.000229495	0.0169951	0.000100882	0.0173042	7.16047e-05	0.0174364	4.54118e-05	0.0174676	3.13674e-05	0.0170383	0.000124269	0.0177591	3.11442e-05	0.0178249	2.06933e-05	0.017897	2.41238e-05	0.0178966	2.65799e-05	0.017845	2.40079e-05
3D plot	FALSE	0.0177406	2.51963e-06			0.00783441	0.00239097	0.0153558	0.000514012	0.0163942	0.000230781	0.0169583	0.000101806	0.0172688	7.23518e-05	0.0174041	4.61891e-05	0.0174366	3.21145e-05	0.0170027	0.00012523	0.0177267	3.20508e-05	0.017792	2.15533e-05	0.0178612	2.4777e-05	0.0178579	2.72631e-05	0.0178089	2.47215e-05
Linear	FALSE	0.0178056	1.03136e-05			0.00778649	0.00239451	0.0153064	0.000515497	0.0163627	0.000231425	0.0169203	0.000102272	0.0172322	7.2729e-05	0.0173707	4.65815e-05	0.0174044	3.24918e-05	0.0169658	0.000125713	0.0176933	3.25089e-05	0.0177578	2.19881e-05	0.0178243	2.51071e-05	0.0178179	2.76084e-05	0.0177716	2.50823e-05
Data Range	D5:H19	0.0177977	1.2134e-05			0.00773805	0.00239438	0.0152565	0.000515478	0.0163307	0.000231416	0.0168819	0.000102269	0.0171952	7.27278e-05	0.0173369	4.65802e-05	0.017372	3.24909e-05	0.0169286	0.000125709	0.0176595	3.25083e-05	0.0177233	2.1988e-05	0.0177869	2.51068e-05	0.0177775	2.76081e-05	0.0177338	2.5082e-05
Filled Symbols	TRUE	0.0177527	8.92121e-06			0.00769016	0.00239056	0.0152071	0.000513953	0.0162992	0.000230751	0.0168438	0.000101796	0.0171586	7.23483e-05	0.0173035	4.61853e-05	0.0173398	3.21116e-05	0.0168917	0.000125216	0.017626	3.2049e-05	0.0176892	2.1553e-05	0.0177499	2.47759e-05	0.0177374	2.7262e-05	0.0176965	2.47207e-05
ConcAge	FALSE	IsoLine	IsoLine			0.00764389	0.00238314	0.0151594	0.000510958	0.0162687	0.000229447	0.0168071	0.000100865	0.0171232	7.15989e-05	0.0172713	4.54055e-05	0.0173088	3.13626e-05	0.0168561	0.000124246	0.0175937	3.11412e-05	0.0176562	2.06929e-05	0.0177142	2.4122e-05	0.0176988	2.65781e-05	0.0176604	2.40065e-05
ConcSwap	FALSE					0.00760027	0.00237229	0.0151144	0.000506559	0.0162399	0.000227533	0.0167724	9.9496e-05	0.0170898	7.04965e-05	0.0172408	4.42584e-05	0.0172795	3.02605e-05	0.0168225	0.000122821	0.0175632	2.98052e-05	0.0176251	1.94267e-05	0.0176805	2.31597e-05	0.0176623	2.55714e-05	0.0176264	2.29553e-05
1st Symbol-row	1					0.00756028	0.00235825	0.0150732	0.000500855	0.0162135	0.00022505	0.0167407	9.77199e-05	0.0170592	6.90655e-05	0.0172129	4.27695e-05	0.0172527	2.883e-05	0.0167917	0.000120973	0.0175353	2.80708e-05	0.0175966	1.77829e-05	0.0176496	2.19104e-05	0.0176289	2.42647e-05	0.0175952	2.15906e-05
						0.00752482	0.00234134	0.0150366	0.000493972	0.0161901	0.000222056	0.0167125	9.55763e-05	0.0170321	6.7338e-05	0.0171882	4.0972e-05	0.0172289	2.7103e-05	0.0167643	0.000118742	0.0175105	2.59769e-05	0.0175713	1.57982e-05	0.0176222	2.0402e-05	0.0175992	2.26869e-05	0.0175675	1.99429e-05
						0.00749467	0.00232193	0.0150055	0.000486064	0.0161702	0.000218616	0.0166885	9.31131e-05	0.017009	6.53526e-05	0.0171671	3.89062e-05	0.0172086	2.51181e-05	0.0167411	0.000116179	0.0174894	2.35702e-05	0.0175498	1.35168e-05	0.0175989	1.86683e-05	0.017574	2.08734e-05	0.017544	1.8049e-05
						0.00747051	0.00230045	0.0149805	0.000477309	0.0161542	0.000214807	0.0166693	9.03854e-05	0.0169905	6.31537e-05	0.0171503	3.66182e-05	0.0171924	2.29197e-05	0.0167224	0.00011334	0.0174725	2.09043e-05	0.0175325	1.09898e-05	0.0175802	1.6748e-05	0.0175537	1.88646e-05	0.0175251	1.59512e-05
						0.00745288	0.00227739	0.0149623	0.000467902	0.0161426	0.000210715	0.0166552	8.7454e-05	0.016977	6.07902e-05	0.0171379	3.4159e-05	0.0171805	2.05568e-05	0.0167088	0.00011029	0.0174601	1.8039e-05	0.0175199	8.27354e-06	0.0175665	1.46839e-05	0.0175389	1.67055e-05	0.0175113	1.36963e-05
						0.00744216	0.00225326	0.0149512	0.000458053	0.0161355	0.000206431	0.0166467	8.43844e-05	0.0169687	5.83151e-05	0.0171304	3.15837e-05	0.0171733	1.80822e-05	0.0167005	0.000107096	0.0174526	1.50382e-05	0.0175122	5.42876e-06	0.0175582	1.25222e-05	0.0175299	1.44443e-05	0.0175029	1.13348e-05
						0.00743861	0.0022286	0.0149474	0.000447981	0.0161331	0.00020205	0.0166438	8.12452e-05	0.016966	5.57837e-05	0.0171279	2.89498e-05	0.0171709	1.55512e-05	0.0166977	0.00010383	0.01745	1.19689e-05	0.0175096	2.519e-06	0.0175554	1.03111e-05	0.0175269	1.21315e-05	0.0175001	8.91937e-06
						0.0074423	0.00220396	0.0149512	0.000437913	0.0161355	0.000197671	0.0166467	7.81065e-05	0.0169687	5.32524e-05	0.0171304	2.6316e-05	0.0171733	1.30204e-05	0.0167005	0.000100565	0.0174526	8.89965e-06	0.0175119	0	0.0175582	8.10011e-06	0.0175299	9.81877e-06	0.0175029	6.50397e-06
						0.00745315	0.00217989	0.0149623	0.000428072	0.0161426	0.000193391	0.0166552	7.50385e-05	0.016977	5.07778e-05	0.0171379	2.37413e-05	0.0171805	1.05462e-05	0.0167088	9.73728e-05	0.0174601	5.89909e-06	0.0179693	0	0.0175665	5.93856e-06	0.0175389	7.55772e-06	0.0175113	4.14257e-06
						0.00747091	0.00215693	0.0149805	0.000418679	0.0161542	0.000189306	0.0166693	7.21096e-05	0.0169905	4.84152e-05	0.0171503	2.12831e-05	0.0171924	8.18404e-06	0.0167224	9.43259e-05	0.0174725	3.03421e-06	0.0179715	2.52025e-06	0.0175802	3.87474e-06	0.0175537	5.3989e-06	0.0175251	1.88792e-06
						0.0074952	0.0021356	0.0150055	0.000409943	0.0161702	0.000185507	0.0166885	6.93854e-05	0.017009	4.62174e-05	0.0171671	1.89963e-05	0.0172086	5.98656e-06	0.0167411	9.1492e-05	0.0174894	3.69003e-07	ErrEll	ErrEll	0.0175989	1.95476e-06	0.017574	3.39054e-06	0.0175421	0
						0.00752546	0.00211635	0.0150366	0.00040206	0.0161901	0.00018208	0.0167125	6.69266e-05	0.0170321	4.42334e-05	0.0171882	1.69321e-05	0.0172289	4.00289e-06	0.0167643	8.89344e-05	0.0174926	0	ClippedEllipse	ClippedEllipse	0.0176222	2.21492e-07	0.0175992	1.57748e-06	0.0179633	0
						0.00756102	0.00209964	0.0150732	0.000395206	0.0162135	0.000179099	0.0167407	6.47881e-05	0.0170592	4.25077e-05	0.0172129	1.51366e-05	0.0172527	2.27733e-06	0.0167917	8.67102e-05	0.0178601	0			0.0176262	0	0.0176289	2.4368e-10	0.0179803	1.89124e-06
						0.00760108	0.00208583	0.0151145	0.000389534	0.0162399	0.000176633	0.0167724	6.30178e-05	0.0170898	4.10787e-05	0.0172409	1.36498e-05	0.0172795	8.48438e-07	0.0168225	8.48691e-05	0.0178634	3.75775e-07			0.0179849	0	0.0176289	0	0.0179941	4.1461e-06
						0.00764476	0.00207523	0.0151595	0.00038517	0.0162687	0.000174737	0.0168071	6.16552e-05	0.0171232	3.99783e-05	0.0172713	1.25049e-05	0.0173021	0	0.0168561	8.34523e-05	0.0178803	3.04159e-06			0.0179889	2.25082e-07	0.0179664	0	0.0180025	6.50762e-06
						0.00769107	0.00206807	0.0152072	0.000382212	0.0162992	0.000173451	0.0168438	6.07308e-05	0.0171586	3.92312e-05	0.0173035	1.17276e-05	0.0174742	0	0.0168917	8.24913e-05	0.0178927	5.90692e-06			0.0180123	1.9588e-06	0.0179665	3.29186e-09	0.0180053	8.92306e-06
						0.00773898	0.00206452	0.0152565	0.000380726	0.0163308	0.000172806	0.0168819	6.02651e-05	0.0171952	3.8854e-05	0.0173369	1.13353e-05	0.0174969	8.54993e-07	0.0169286	8.20077e-05	0.0179002	8.90776e-06			0.0180309	3.87916e-06	0.0179962	1.58107e-06	ErrEll	ErrEll
						0.00778743	0.00206466	0.0153065	0.000380746	0.0163627	0.000172816	0.0169203	6.02686e-05	0.0172322	3.88552e-05	0.0173707	1.13366e-05	0.0175237	2.28551e-06	0.0169658	8.20122e-05	0.0179027	1.19771e-05			0.0180446	5.94324e-06	0.0180214	3.39458e-06	ClippedEllipse	ClippedEllipse
						0.00783532	0.00206848	0.0153558	0.00038227	0.0163943	0.000173481	0.0169584	6.07412e-05	0.0172688	3.92347e-05	0.0174041	1.17315e-05	0.0175475	4.0125e-06	0.0170027	8.25048e-05	ErrEll	ErrEll			0.0180529	8.10496e-06	0.0180417	5.40331e-06
						0.00788159	0.0020759	0.0154035	0.000385265	0.0164248	0.000174785	0.0169951	6.16724e-05	0.0173042	3.99841e-05	0.0174364	1.25112e-05	0.0175678	5.99739e-06	0.0170383	8.34744e-05	ClippedEllipse	ClippedEllipse			0.0180557	1.0316e-05	0.0180564	7.56239e-06
						0.0079252	0.00208675	0.0154485	0.000389664	0.0164535	0.000176699	0.0170297	6.30413e-05	0.0173376	4.10865e-05	0.0174668	1.36584e-05	0.017584	8.19585e-06	0.0170719	8.48995e-05					ErrEll	ErrEll	0.0180654	9.8236e-06
						0.00796519	0.00210078	0.0154898	0.000395369	0.0164799	0.000179182	0.0170615	6.48173e-05	0.0173682	4.25175e-05	0.0174947	1.51473e-05	0.0175959	1.05588e-05	0.0171027	8.67481e-05					ClippedEllipse	ClippedEllipse	0.0180685	1.21364e-05
						0.00800066	0.0021177	0.0155263	0.000402252	0.0165033	0.000182176	0.0170897	6.69609e-05	0.0173953	4.42449e-05	0.0175195	1.69448e-05	0.0176031	1.30333e-05	0.0171301	8.89789e-05							ErrEll	ErrEll
						0.0080308	0.00213711	0.0155575	0.000410159	0.0165232	0.000185616	0.0171137	6.94241e-05	0.0174184	4.62303e-05	0.0175405	1.90106e-05	0.0176055	1.55643e-05	0.0171533	9.15422e-05							ClippedEllipse	ClippedEllipse
						0.00805497	0.00215859	0.0155824	0.000418914	0.0165392	0.000189425	0.0171329	7.21518e-05	0.0174369	4.84293e-05	0.0175574	2.12986e-05	ErrEll	ErrEll	0.0171719	9.43806e-05
						0.0080726	0.00218165	0.0156007	0.000428322	0.0165509	0.000193517	0.017147	7.50833e-05	0.0174505	5.07928e-05	0.0175697	2.37577e-05	ClippedEllipse	ClippedEllipse	0.0171856	9.74308e-05
						0.00808331	0.00220578	0.0156118	0.000438171	0.016558	0.000197801	0.0171555	7.81528e-05	0.0174587	5.32679e-05	0.0175772	2.6333e-05			0.0171939	0.000100625
						0.00808686	0.00223044	0.0156155	0.000448242	0.0165604	0.000202182	0.0171584	8.1292e-05	0.0174615	5.57993e-05	0.0175798	2.8967e-05			0.0171967	0.000103891
						ErrEll	ErrEll	ErrEll	ErrEll	ErrEll	ErrEll	ErrEll	ErrEll	ErrEll	ErrEll	ErrEll	ErrEll			ErrEll	ErrEll
																				ClippedEllipse	ClippedEllipse

## Sheet: PlotDat4
Source sheet	Corr Plot	0.00776274	0.00222952	0.005	0.00282047	0.00808686	0.00223044	0.0156155	0.000448242	0.0165604	0.000202182	0.0171584	8.1292e-05	0.0174615	5.57993e-05	0.0175798	2.8967e-05	0.0176055	1.55643e-05	0.0171967	0.000103891	0.0179027	1.19771e-05	0.0179715	2.52025e-06	0.0180557	1.0316e-05	0.0180685	1.21364e-05	0.0180053	8.92306e-06
Plot name	Isochron4	0.0152815	0.000448112	0.0175589	0	0.00808317	0.00225508	0.0156118	0.000458311	0.016558	0.000206561	0.0171555	8.44307e-05	0.0174587	5.83306e-05	0.0175772	3.16008e-05	0.0176031	1.80951e-05	0.0171939	0.000107156	0.0179002	1.50463e-05	0.0179689	5.43e-06	0.0180529	1.2527e-05	0.0180654	1.44492e-05	0.0180025	1.13385e-05
Plot Type	2	0.0163467	0.000202116			0.00807232	0.00227915	0.0156007	0.000468152	0.0165509	0.000210841	0.017147	8.74987e-05	0.0174505	6.08052e-05	0.0175697	3.41755e-05	0.0175959	2.05693e-05	0.0171856	0.000110348	0.0178927	1.80468e-05	0.0179613	8.27473e-06	0.0180446	1.46886e-05	0.0180564	1.67102e-05	0.0179941	1.36998e-05
1st free col	33	0.0169011	8.12686e-05			0.00805456	0.00230211	0.0155824	0.000477545	0.0165392	0.000214926	0.0171329	9.04276e-05	0.0174369	6.31678e-05	0.0175574	3.66337e-05	0.017584	2.29315e-05	0.0171719	0.000113395	0.0178803	2.09117e-05	0.0179486	1.09909e-05	0.0180309	1.67524e-05	0.0180417	1.8869e-05	0.0179803	1.59545e-05
Sigma Level	1	0.0172137	5.57915e-05			0.00803028	0.00232344	0.0155574	0.00048628	0.0165232	0.000218725	0.0171137	9.31518e-05	0.0174184	6.53656e-05	0.0175405	3.89204e-05	0.0175678	2.5129e-05	0.0171533	0.000116229	0.0178634	2.35769e-05	0.0179314	1.35178e-05	0.0180123	1.86724e-05	0.0180214	2.08774e-05	0.0179614	1.8052e-05
Absolute Errs	TRUE	0.0173538	2.89584e-05			0.00800002	0.00234269	0.0155263	0.000494163	0.0165033	0.000222152	0.0170897	9.56107e-05	0.0173953	6.73495e-05	0.0175195	4.09846e-05	0.0175475	2.71126e-05	0.0171301	0.000118786	0.0178423	2.59829e-05	0.0179099	1.57991e-05	0.0179889	2.04056e-05	0.0179962	2.26905e-05	0.0179379	1.99456e-05
Symbol Type	1	0.0173882	1.55578e-05			0.00796446	0.0023594	0.0154897	0.000501017	0.0164799	0.000225133	0.0170615	9.77491e-05	0.0173682	6.90753e-05	0.0174947	4.27802e-05	0.0175237	2.88382e-05	0.0171027	0.000121011	0.0178175	2.8076e-05	0.0178846	1.77837e-05	0.0179615	2.19134e-05	0.0179665	2.42677e-05	0.0179102	2.15929e-05
Inverse Plot	TRUE	0.0169472	0.00010386			0.00792439	0.00237321	0.0154485	0.00050669	0.0164535	0.000227599	0.0170297	9.95194e-05	0.0173376	7.05043e-05	0.0174668	4.4267e-05	0.0174969	3.02671e-05	0.0170719	0.000122852	0.0177896	2.98093e-05	0.017856	1.94274e-05	0.0179306	2.31622e-05	0.0179331	2.55739e-05	0.017879	2.29572e-05
Color Plot	TRUE	0.0176764	1.1973e-05			0.00788072	0.00238381	0.0154035	0.000511054	0.0164248	0.000229495	0.0169951	0.000100882	0.0173042	7.16047e-05	0.0174364	4.54118e-05	0.0174676	3.13674e-05	0.0170383	0.000124269	0.0177591	3.11442e-05	0.0178249	2.06933e-05	0.017897	2.41238e-05	0.0178966	2.65799e-05	0.017845	2.40079e-05
3D plot	FALSE	0.0177406	2.51963e-06			0.00783441	0.00239097	0.0153558	0.000514012	0.0163942	0.000230781	0.0169583	0.000101806	0.0172688	7.23518e-05	0.0174041	4.61891e-05	0.0174366	3.21145e-05	0.0170027	0.00012523	0.0177267	3.20508e-05	0.017792	2.15533e-05	0.0178612	2.4777e-05	0.0178579	2.72631e-05	0.0178089	2.47215e-05
Linear	FALSE	0.0178056	1.03136e-05			0.00778649	0.00239451	0.0153064	0.000515497	0.0163627	0.000231425	0.0169203	0.000102272	0.0172322	7.2729e-05	0.0173707	4.65815e-05	0.0174044	3.24918e-05	0.0169658	0.000125713	0.0176933	3.25089e-05	0.0177578	2.19881e-05	0.0178243	2.51071e-05	0.0178179	2.76084e-05	0.0177716	2.50823e-05
Data Range	D5:H19	0.0177977	1.2134e-05			0.00773805	0.00239438	0.0152565	0.000515478	0.0163307	0.000231416	0.0168819	0.000102269	0.0171952	7.27278e-05	0.0173369	4.65802e-05	0.017372	3.24909e-05	0.0169286	0.000125709	0.0176595	3.25083e-05	0.0177233	2.1988e-05	0.0177869	2.51068e-05	0.0177775	2.76081e-05	0.0177338	2.5082e-05
Filled Symbols	TRUE	0.0177527	8.92121e-06			0.00769016	0.00239056	0.0152071	0.000513953	0.0162992	0.000230751	0.0168438	0.000101796	0.0171586	7.23483e-05	0.0173035	4.61853e-05	0.0173398	3.21116e-05	0.0168917	0.000125216	0.017626	3.2049e-05	0.0176892	2.1553e-05	0.0177499	2.47759e-05	0.0177374	2.7262e-05	0.0176965	2.47207e-05
ConcAge	FALSE	IsoLine	IsoLine			0.00764389	0.00238314	0.0151594	0.000510958	0.0162687	0.000229447	0.0168071	0.000100865	0.0171232	7.15989e-05	0.0172713	4.54055e-05	0.0173088	3.13626e-05	0.0168561	0.000124246	0.0175937	3.11412e-05	0.0176562	2.06929e-05	0.0177142	2.4122e-05	0.0176988	2.65781e-05	0.0176604	2.40065e-05
ConcSwap	FALSE					0.00760027	0.00237229	0.0151144	0.000506559	0.0162399	0.000227533	0.0167724	9.9496e-05	0.0170898	7.04965e-05	0.0172408	4.42584e-05	0.0172795	3.02605e-05	0.0168225	0.000122821	0.0175632	2.98052e-05	0.0176251	1.94267e-05	0.0176805	2.31597e-05	0.0176623	2.55714e-05	0.0176264	2.29553e-05
1st Symbol-row	1					0.00756028	0.00235825	0.0150732	0.000500855	0.0162135	0.00022505	0.0167407	9.77199e-05	0.0170592	6.90655e-05	0.0172129	4.27695e-05	0.0172527	2.883e-05	0.0167917	0.000120973	0.0175353	2.80708e-05	0.0175966	1.77829e-05	0.0176496	2.19104e-05	0.0176289	2.42647e-05	0.0175952	2.15906e-05
						0.00752482	0.00234134	0.0150366	0.000493972	0.0161901	0.000222056	0.0167125	9.55763e-05	0.0170321	6.7338e-05	0.0171882	4.0972e-05	0.0172289	2.7103e-05	0.0167643	0.000118742	0.0175105	2.59769e-05	0.0175713	1.57982e-05	0.0176222	2.0402e-05	0.0175992	2.26869e-05	0.0175675	1.99429e-05
						0.00749467	0.00232193	0.0150055	0.000486064	0.0161702	0.000218616	0.0166885	9.31131e-05	0.017009	6.53526e-05	0.0171671	3.89062e-05	0.0172086	2.51181e-05	0.0167411	0.000116179	0.0174894	2.35702e-05	0.0175498	1.35168e-05	0.0175989	1.86683e-05	0.017574	2.08734e-05	0.017544	1.8049e-05
						0.00747051	0.00230045	0.0149805	0.000477309	0.0161542	0.000214807	0.0166693	9.03854e-05	0.0169905	6.31537e-05	0.0171503	3.66182e-05	0.0171924	2.29197e-05	0.0167224	0.00011334	0.0174725	2.09043e-05	0.0175325	1.09898e-05	0.0175802	1.6748e-05	0.0175537	1.88646e-05	0.0175251	1.59512e-05
						0.00745288	0.00227739	0.0149623	0.000467902	0.0161426	0.000210715	0.0166552	8.7454e-05	0.016977	6.07902e-05	0.0171379	3.4159e-05	0.0171805	2.05568e-05	0.0167088	0.00011029	0.0174601	1.8039e-05	0.0175199	8.27354e-06	0.0175665	1.46839e-05	0.0175389	1.67055e-05	0.0175113	1.36963e-05
						0.00744216	0.00225326	0.0149512	0.000458053	0.0161355	0.000206431	0.0166467	8.43844e-05	0.0169687	5.83151e-05	0.0171304	3.15837e-05	0.0171733	1.80822e-05	0.0167005	0.000107096	0.0174526	1.50382e-05	0.0175122	5.42876e-06	0.0175582	1.25222e-05	0.0175299	1.44443e-05	0.0175029	1.13348e-05
						0.00743861	0.0022286	0.0149474	0.000447981	0.0161331	0.00020205	0.0166438	8.12452e-05	0.016966	5.57837e-05	0.0171279	2.89498e-05	0.0171709	1.55512e-05	0.0166977	0.00010383	0.01745	1.19689e-05	0.0175096	2.519e-06	0.0175554	1.03111e-05	0.0175269	1.21315e-05	0.0175001	8.91937e-06
						0.0074423	0.00220396	0.0149512	0.000437913	0.0161355	0.000197671	0.0166467	7.81065e-05	0.0169687	5.32524e-05	0.0171304	2.6316e-05	0.0171733	1.30204e-05	0.0167005	0.000100565	0.0174526	8.89965e-06	0.0175119	0	0.0175582	8.10011e-06	0.0175299	9.81877e-06	0.0175029	6.50397e-06
						0.00745315	0.00217989	0.0149623	0.000428072	0.0161426	0.000193391	0.0166552	7.50385e-05	0.016977	5.07778e-05	0.0171379	2.37413e-05	0.0171805	1.05462e-05	0.0167088	9.73728e-05	0.0174601	5.89909e-06	0.0179693	0	0.0175665	5.93856e-06	0.0175389	7.55772e-06	0.0175113	4.14257e-06
						0.00747091	0.00215693	0.0149805	0.000418679	0.0161542	0.000189306	0.0166693	7.21096e-05	0.0169905	4.84152e-05	0.0171503	2.12831e-05	0.0171924	8.18404e-06	0.0167224	9.43259e-05	0.0174725	3.03421e-06	0.0179715	2.52025e-06	0.0175802	3.87474e-06	0.0175537	5.3989e-06	0.0175251	1.88792e-06
						0.0074952	0.0021356	0.0150055	0.000409943	0.0161702	0.000185507	0.0166885	6.93854e-05	0.017009	4.62174e-05	0.0171671	1.89963e-05	0.0172086	5.98656e-06	0.0167411	9.1492e-05	0.0174894	3.69003e-07	ErrEll	ErrEll	0.0175989	1.95476e-06	0.017574	3.39054e-06	0.0175421	0
						0.00752546	0.00211635	0.0150366	0.00040206	0.0161901	0.00018208	0.0167125	6.69266e-05	0.0170321	4.42334e-05	0.0171882	1.69321e-05	0.0172289	4.00289e-06	0.0167643	8.89344e-05	0.0174926	0	ClippedEllipse	ClippedEllipse	0.0176222	2.21492e-07	0.0175992	1.57748e-06	0.0179633	0
						0.00756102	0.00209964	0.0150732	0.000395206	0.0162135	0.000179099	0.0167407	6.47881e-05	0.0170592	4.25077e-05	0.0172129	1.51366e-05	0.0172527	2.27733e-06	0.0167917	8.67102e-05	0.0178601	0			0.0176262	0	0.0176289	2.4368e-10	0.0179803	1.89124e-06
						0.00760108	0.00208583	0.0151145	0.000389534	0.0162399	0.000176633	0.0167724	6.30178e-05	0.0170898	4.10787e-05	0.0172409	1.36498e-05	0.0172795	8.48438e-07	0.0168225	8.48691e-05	0.0178634	3.75775e-07			0.0179849	0	0.0176289	0	0.0179941	4.1461e-06
						0.00764476	0.00207523	0.0151595	0.00038517	0.0162687	0.000174737	0.0168071	6.16552e-05	0.0171232	3.99783e-05	0.0172713	1.25049e-05	0.0173021	0	0.0168561	8.34523e-05	0.0178803	3.04159e-06			0.0179889	2.25082e-07	0.0179664	0	0.0180025	6.50762e-06
						0.00769107	0.00206807	0.0152072	0.000382212	0.0162992	0.000173451	0.0168438	6.07308e-05	0.0171586	3.92312e-05	0.0173035	1.17276e-05	0.0174742	0	0.0168917	8.24913e-05	0.0178927	5.90692e-06			0.0180123	1.9588e-06	0.0179665	3.29186e-09	0.0180053	8.92306e-06
						0.00773898	0.00206452	0.0152565	0.000380726	0.0163308	0.000172806	0.0168819	6.02651e-05	0.0171952	3.8854e-05	0.0173369	1.13353e-05	0.0174969	8.54993e-07	0.0169286	8.20077e-05	0.0179002	8.90776e-06			0.0180309	3.87916e-06	0.0179962	1.58107e-06	ErrEll	ErrEll
						0.00778743	0.00206466	0.0153065	0.000380746	0.0163627	0.000172816	0.0169203	6.02686e-05	0.0172322	3.88552e-05	0.0173707	1.13366e-05	0.0175237	2.28551e-06	0.0169658	8.20122e-05	0.0179027	1.19771e-05			0.0180446	5.94324e-06	0.0180214	3.39458e-06	ClippedEllipse	ClippedEllipse
						0.00783532	0.00206848	0.0153558	0.00038227	0.0163943	0.000173481	0.0169584	6.07412e-05	0.0172688	3.92347e-05	0.0174041	1.17315e-05	0.0175475	4.0125e-06	0.0170027	8.25048e-05	ErrEll	ErrEll			0.0180529	8.10496e-06	0.0180417	5.40331e-06
						0.00788159	0.0020759	0.0154035	0.000385265	0.0164248	0.000174785	0.0169951	6.16724e-05	0.0173042	3.99841e-05	0.0174364	1.25112e-05	0.0175678	5.99739e-06	0.0170383	8.34744e-05	ClippedEllipse	ClippedEllipse			0.0180557	1.0316e-05	0.0180564	7.56239e-06
						0.0079252	0.00208675	0.0154485	0.000389664	0.0164535	0.000176699	0.0170297	6.30413e-05	0.0173376	4.10865e-05	0.0174668	1.36584e-05	0.017584	8.19585e-06	0.0170719	8.48995e-05					ErrEll	ErrEll	0.0180654	9.8236e-06
						0.00796519	0.00210078	0.0154898	0.000395369	0.0164799	0.000179182	0.0170615	6.48173e-05	0.0173682	4.25175e-05	0.0174947	1.51473e-05	0.0175959	1.05588e-05	0.0171027	8.67481e-05					ClippedEllipse	ClippedEllipse	0.0180685	1.21364e-05
						0.00800066	0.0021177	0.0155263	0.000402252	0.0165033	0.000182176	0.0170897	6.69609e-05	0.0173953	4.42449e-05	0.0175195	1.69448e-05	0.0176031	1.30333e-05	0.0171301	8.89789e-05							ErrEll	ErrEll
						0.0080308	0.00213711	0.0155575	0.000410159	0.0165232	0.000185616	0.0171137	6.94241e-05	0.0174184	4.62303e-05	0.0175405	1.90106e-05	0.0176055	1.55643e-05	0.0171533	9.15422e-05							ClippedEllipse	ClippedEllipse
						0.00805497	0.00215859	0.0155824	0.000418914	0.0165392	0.000189425	0.0171329	7.21518e-05	0.0174369	4.84293e-05	0.0175574	2.12986e-05	ErrEll	ErrEll	0.0171719	9.43806e-05
						0.0080726	0.00218165	0.0156007	0.000428322	0.0165509	0.000193517	0.017147	7.50833e-05	0.0174505	5.07928e-05	0.0175697	2.37577e-05	ClippedEllipse	ClippedEllipse	0.0171856	9.74308e-05
						0.00808331	0.00220578	0.0156118	0.000438171	0.016558	0.000197801	0.0171555	7.81528e-05	0.0174587	5.32679e-05	0.0175772	2.6333e-05			0.0171939	0.000100625
						0.00808686	0.00223044	0.0156155	0.000448242	0.0165604	0.000202182	0.0171584	8.1292e-05	0.0174615	5.57993e-05	0.0175798	2.8967e-05			0.0171967	0.000103891
						ErrEll	ErrEll	ErrEll	ErrEll	ErrEll	ErrEll	ErrEll	ErrEll	ErrEll	ErrEll	ErrEll	ErrEll			ErrEll	ErrEll
																				ClippedEllipse	ClippedEllipse

## Sheet: Corr Plot
			Inverse isochron (Correlation Plot)
Step no	Power		39Ar/40Ar	±	36Ar/40Ar	±	r
	(Watts)			(1 s)		(1 s)
1	0.5		0.00776274	0.000132417	0.00222952	6.7569e-05	0.00410027
2	1		0.0152815	0.000136466	0.000448112	2.76029e-05	0.00185374
3	1.25		0.0163467	8.72791e-05	0.000202116	1.20057e-05	0.00219838
4	1.5		0.0169011	0.000105119	8.12686e-05	8.6041e-06	0.00110471
5	1.75		0.0172137	0.000101222	5.57915e-05	6.93877e-06	0.000459718
6	2		0.0173538	9.23086e-05	2.89584e-05	7.21966e-06	0.000484473
7	2.25		0.0173882	8.87888e-05	1.55578e-05	6.93743e-06	0.000383618
8	2.37		0.0169472	0.000101911	0.00010386	8.95182e-06	0.00137429
9	2.42		0.0176764	9.24716e-05	1.1973e-05	8.41314e-06	0.000197332
10	2.47		0.0177406	9.43489e-05	2.51963e-06	7.97591e-06	3.17287e-05
11	2.58		0.0178056	0.000102198	1.03136e-05	6.06062e-06	0.000164494
12	2.67		0.0177977	0.000110625	1.2134e-05	6.33957e-06	0.00015701
13	3		0.0177527	0.000103209	8.92121e-06	6.62089e-06	0.000113349

## Sheet: Corr Vol
Atmospheric ratios						Production ratios								Decay Constants*				Correction factors
				±			±			±									±
36/38Atms=	5.32278	40/39K=	0.0302	0.00091	39/37Ca=	0.000706	2.8e-05	36/37Ca=	0.000279	8.4e-06			Lambda40=	5.543e-10	Lambda39=	7.0554e-06	ClK fact=	0.23	0.02
40/36Atms=	295.5	38/39K=	0.014	0	38/37Ca=	3.17e-05	2e-07	36/39Ca=	0.395184	0.0196776	36/38Cl=	316	Lambda37=	0.019748	Lambda Cl=	2.303e-06	CaK fact=	1.83	0.085
Ca fact	31.6192	DefCacorr	500		40/36Meas	291.806			SUM 39ArK	6121		SUM 40Ar*	347298		*Note	40 decay is in years						141.633
Default volume if -ve =		0.01	Volumes * 10-13 cm3													37, 39 and Cl are in days						141.623
Parker	Phlogopite		Ar isotopes derived from Calcium						Ar isotopes derived from Potassium							Ar isotopes derived from Chlorine			Ar isotopes derived from Atmosphere					Radiogenic Argon
Step	T Out (Days)	39	± (1s)	38	± (1s)	36	± (1s)	40	± (1s)	39	± (1s)	38	± (1s)	38	± (1s)	36	± (1s)	40	± (1s)	38	± (1s)	36	± (1s)	40*	± (1s)
1	173.631	0.0033229	0.00381196	0.000149201	0.00017106	0.00131316	0.00150604	0.507667	0.0175628	16.8102	0.285703	0.235342	0.00399984	7.82288	0.321928	0.00270635	0.000111372	1426.68	43.1877	0.907047	0.0274577	4.82802	0.146151	738.817	43.3027
2	173.644	0.0238367	0.00454184	0.00107029	0.00019958	0.00941987	0.00177831	2.11116	0.0663149	69.9058	0.620268	0.978682	0.00868375	6.28088	0.292187	0.00217306	0.000101091	605.748	37.308	0.38512	0.0237195	2.04991	0.126254	3968.8	37.5929
3	173.658	0.0162884	0.00421141	0.000731365	0.000186915	0.00643693	0.00165596	4.04554	0.123755	133.958	0.706436	1.87542	0.00989011	8.211	0.375138	0.00284107	0.000129801	489.438	29.0697	0.311172	0.0184818	1.6563	0.0983746	7705.38	29.8642
4	173.674	0.0234722	0.0132845	0.00105392	0.000595055	0.00927584	0.00524435	14.4053	0.443047	476.997	2.93872	6.67796	0.0411421	26.9061	1.08761	0.00931056	0.000376357	677.768	71.7546	0.430908	0.0456198	2.29363	0.242824	27545.1	75.6846
5	173.689	0.0155197	0.0101692	0.000696849	0.000455788	0.00613315	0.00401557	16.8742	0.51796	558.749	3.26959	7.82248	0.0457743	31.6042	1.57469	0.0109372	0.000544953	535.14	66.5545	0.340229	0.0423137	1.81097	0.225227	31924.4	69.1646
6	173.704	0.00957901	0.0149122	0.000430106	0.000669361	0.00378547	0.00589227	24.8037	0.758692	821.315	4.31886	11.4984	0.060464	45.8278	2.45654	0.015861	0.000850205	404.992	100.969	0.257484	0.0641933	1.37053	0.341687	46922.6	107.86
7	173.719	0.0124999	0.0146377	0.000561256	0.000656877	0.00493976	0.00578317	27.4105	0.837328	907.631	4.55631	12.7068	0.0637884	50.2534	1.74465	0.0173941	0.000603872	239.971	107.006	0.152568	0.068032	0.812085	0.36212	51958.1	117.602
8	173.734	0.018746	0.00675868	0.000841709	0.000301676	0.0074081	0.00266407	11.0863	0.340517	367.096	2.18567	5.13935	0.0305994	22.6706	0.926682	0.00784763	0.000320778	664.798	57.2968	0.422662	0.0364279	2.24974	0.193898	20996.4	60.1427
9	173.764	0.0169562	0.00748953	0.000761347	0.000334962	0.00670081	0.00295468	12.0903	0.369616	400.341	2.06639	5.60477	0.0289294	23.6227	0.970057	0.00817864	0.000335852	80.1301	56.3056	0.0509447	0.0357977	0.271168	0.190543	22568.2	59.5181
10	173.779	0.0465097	0.0111799	0.00208832	0.000495283	0.0183799	0.00439257	19.2282	0.588181	636.697	3.35399	8.91375	0.0469558	39.122	1.13921	0.013546	0.000394449	26.7214	84.5868	0.0169888	0.0537782	0.0904276	0.28625	35862.6	88.5604
11	173.794	0.021572	0.00974538	0.000968602	0.000435929	0.00852492	0.00384493	12.5174	0.383849	414.484	2.35889	5.80277	0.0330245	25.7821	0.836947	0.00892779	0.000289817	70.9444	41.6894	0.0451047	0.0265051	0.240082	0.141081	23207.4	45.1514
12	173.811	0.120118	0.0123434	0.00539341	0.000512421	0.0474688	0.00472149	14.0586	0.432423	465.518	2.87436	6.51725	0.0402411	52.358	1.2411	0.0181322	0.000429807	93.7849	48.9993	0.0596261	0.0311525	0.317377	0.165818	26062.3	52.4382
13	173.827	0.0332601	0.0138355	0.00149341	0.00061847	0.0131439	0.00545705	25.7153	0.788951	851.5	4.91441	11.921	0.0688017	48.0611	1.78803	0.0166457	0.000619275	126.445	93.8412	0.0803906	0.0596619	0.427902	0.317568	47838.1	99.656
										1e-08
										1e-08
										1e-08
										1e-08
										1e-08
										1e-08
										1e-08
										1e-08
										1e-08
										1e-08
										1e-08
										1e-08
										1e-08
										1e-08
										1e-08
										1e-08
										1e-08
										1e-08
										1e-08
										1e-08
										1e-08
										1e-08
										1e-08
										1e-08
										1e-08
										1e-08
										1e-08
										1e-08
										1e-08
										1e-08
										1e-08
										1e-08
										1e-08
										1e-08
										1e-08
										1e-08
										1e-08
										1e-08
										1e-08
										1e-08
										1e-08
										1e-08
										1e-08
										1e-08
										1e-08
										1e-08
										1e-08

## Sheet: Volumes
						True volumes corrected
			Col I and J; removed mult by col D Jan 14 2012
																		Extraction blank (mv)
Step			40 meas	± (1s)	39 meas	± (1s)	38 meas	± (1s)	37 meas	± (1s)	36 meas	± (1s)		40	±	39	±	38	±	37	±	36	±
1			2166	3.15275	16.8135	0.285678	8.96542	0.320709	4.70666	5.39614	4.83204	0.146144		27.7456	0.534241	0.195254	0.049497	0.075004	0.064376	0.112861	0.103346	0.101119	0.050813
2			4576.66	4.61893	69.9297	0.620251	7.64576	0.291072	33.763	6.2923	2.0615	0.126241		27.7653	0.53462	0.195393	0.049532	0.075058	0.064422	0.112941	0.103419	0.101191	0.050849
3			8198.87	6.84152	133.975	0.706424	10.3983	0.374527	23.0715	5.89457	1.66558	0.0983606		27.5439	0.530358	0.193835	0.049137	0.074459	0.063908	0.11204	0.102595	0.100384	0.050443
4			28237.3	24.0672	477.021	2.93869	34.016	1.08581	33.2467	18.7703	2.31222	0.242768		27.1012	0.521832	0.190719	0.048347	0.073262	0.062881	0.110239	0.100946	0.09877	0.049632
5			32476.4	18.814	558.764	3.26958	39.7676	1.57336	21.9826	14.3775	1.82804	0.22519		27.2635	0.524958	0.191861	0.048637	0.073701	0.063258	0.1109	0.10155	0.099362	0.04993
6			47352.4	37.9277	821.324	4.31883	57.5841	2.45479	13.568	21.1153	1.39018	0.341635		27.1553	0.522874	0.1911	0.048444	0.073408	0.063006	0.110459	0.101147	0.098968	0.049732
7			52225.5	48.7773	907.643	4.55629	63.1133	1.74204	17.7052	20.7214	0.834419	0.362073		27.0618	0.521075	0.190442	0.048277	0.073156	0.06279	0.110079	0.100799	0.098627	0.04956
8			21672.3	18.2785	367.115	2.18566	28.2335	0.925399	26.5523	9.51511	2.265	0.193879		27.0175	0.520222	0.19013	0.048198	0.073036	0.062687	0.109899	0.100634	0.098466	0.049479
9			22660.4	19.2859	400.358	2.06637	29.2792	0.968901	24.0172	10.5655	0.286047	0.19052		27.4701	0.528937	0.193315	0.049005	0.07426	0.063737	0.11174	0.10232	0.100115	0.050308
10			35908.5	26.2234	636.743	3.35397	48.0549	1.13689	65.8777	15.6185	0.122353	0.286216		27.3914	0.527421	0.192762	0.048865	0.074047	0.063554	0.11142	0.102027	0.099828	0.050164
11			23290.8	17.3348	414.505	2.35887	31.631	0.83582	30.5553	13.7504	0.257535	0.141028		27.3324	0.526284	0.192346	0.04876	0.073887	0.063417	0.11118	0.101807	0.099613	0.050056
12			26170.1	18.6721	465.638	2.87434	58.9403	1.23996	170.139	16.129	0.382978	0.16575		27.5341	0.530168	0.193765	0.049119	0.074432	0.063885	0.112	0.102558	0.100348	0.050425
13			47990.3	33.5337	851.534	4.91439	60.064	1.78559	47.1107	19.5078	0.457691	0.31752		27.2832	0.525337	0.192	0.048672	0.073754	0.063303	0.11098	0.101624	0.099434	0.049966
